# Supplementary material for: Ag/AgCl nanoparticles embedded in porous TiO2: defect formation triggered by light irradiation
Source: Royal Society of Chemistry journal article supplement (doi:10.1039/d1nj01419f), 2021-01-01
Supplement: d1nj01419f1.pdf [file d1nj01419f1.pdf]

Supporting Information for

**Ag/AgCl Nanoparticles Embedded Porous TiO<sub>2</sub>: Defect Formation triggered  
by light irradiation**

Haneul Jeong<sup>a</sup>, and Junhyung Lee<sup>b,c\*</sup>

<sup>a</sup>Blue Wind Tech Co., Ltd. 34-5 Malgeunnae-gil, Uiwang-si, Gyeonggi-do, 16072, Korea

<sup>b</sup>ECA, Korea Advanced Nano Fab Center, 109, Gwanggyo-ro, Yeongtong-gu, Suwon-si,  
Gyeonggi-do, 16229, Korea

<sup>c</sup>Department of Materials Science and Engineering, Seoul National University, 1 Gwanak-ro,  
Gwanak-gu, Seoul 08826, Korea

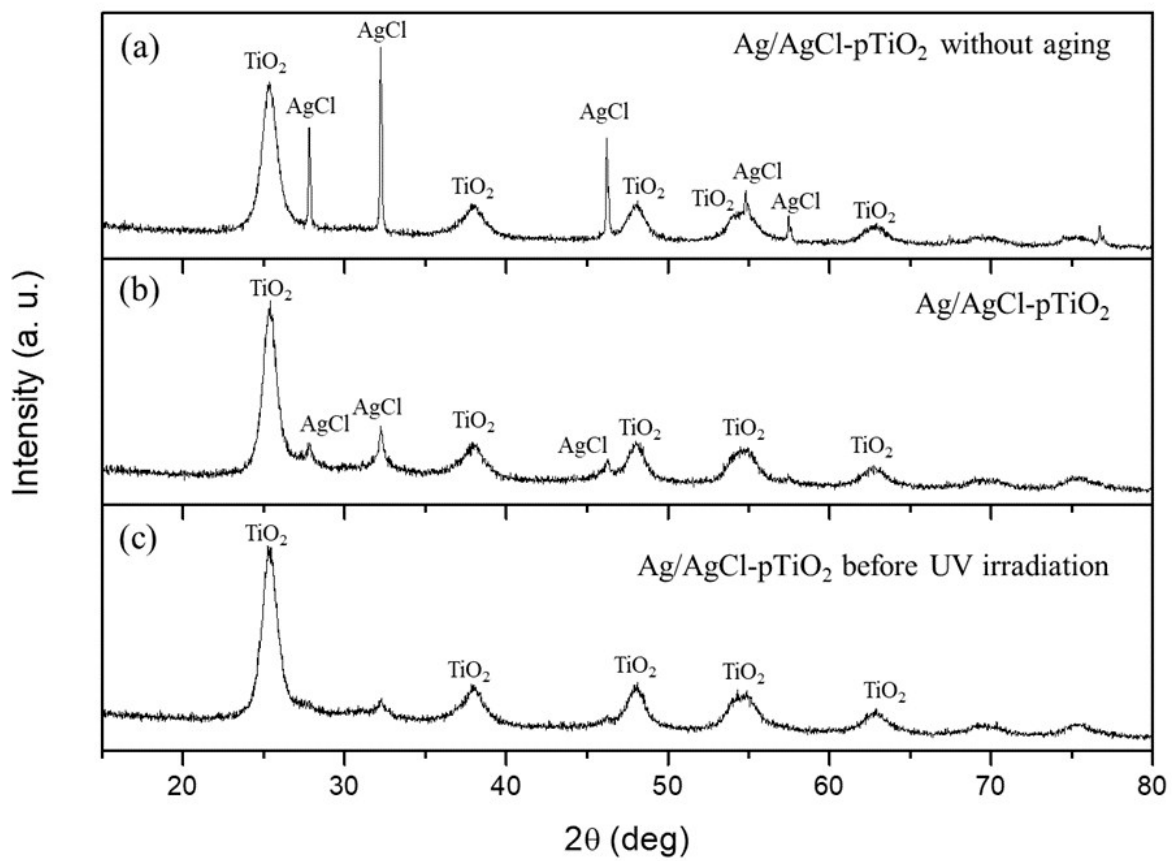

Fig. S1. XRD pattern of (a) Ag/AgCl-pTiO<sub>2</sub> without aging (b) Ag/AgCl-pTiO<sub>2</sub> (c) Ag/AgCl-pTiO<sub>2</sub> before UV irradiation

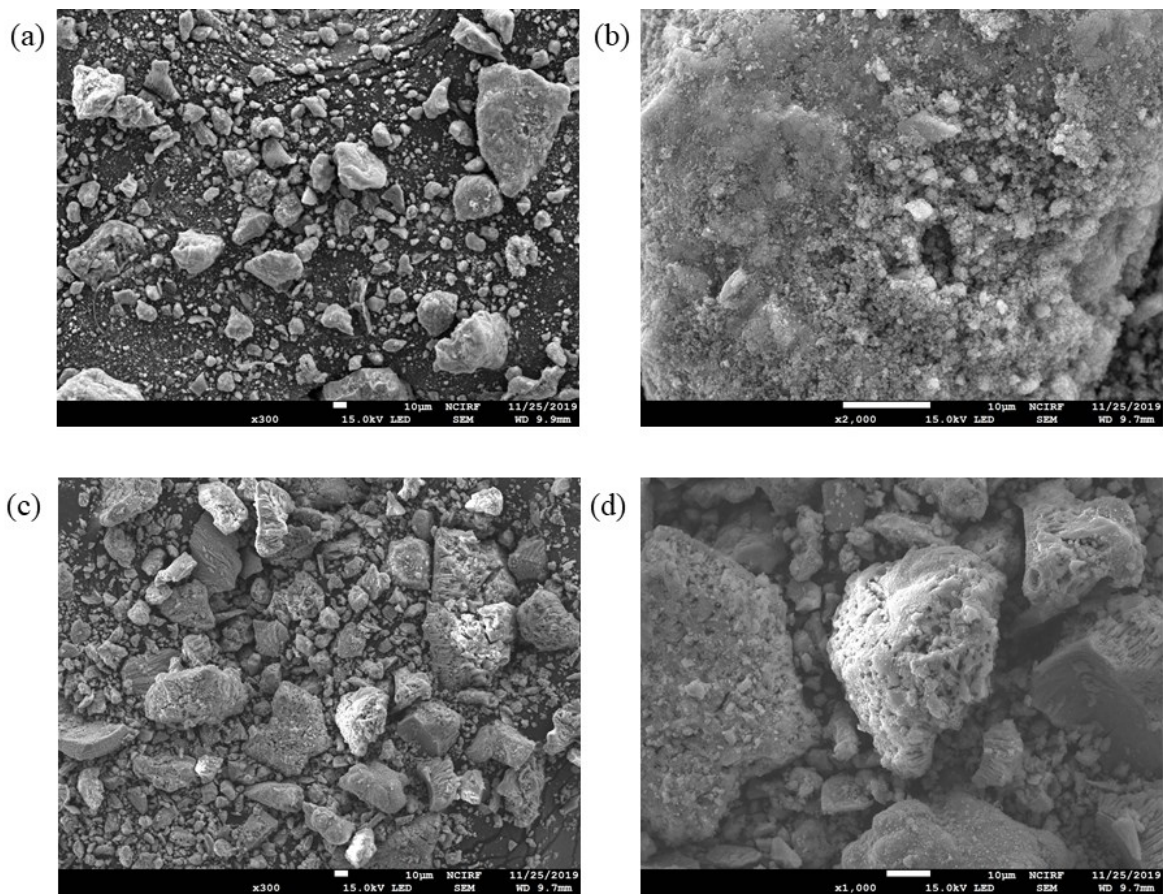

Fig. S2. SEM images of (a,b) Cl-pTiO<sub>2</sub> (c,d) Ag/AgCl-pTiO<sub>2</sub>

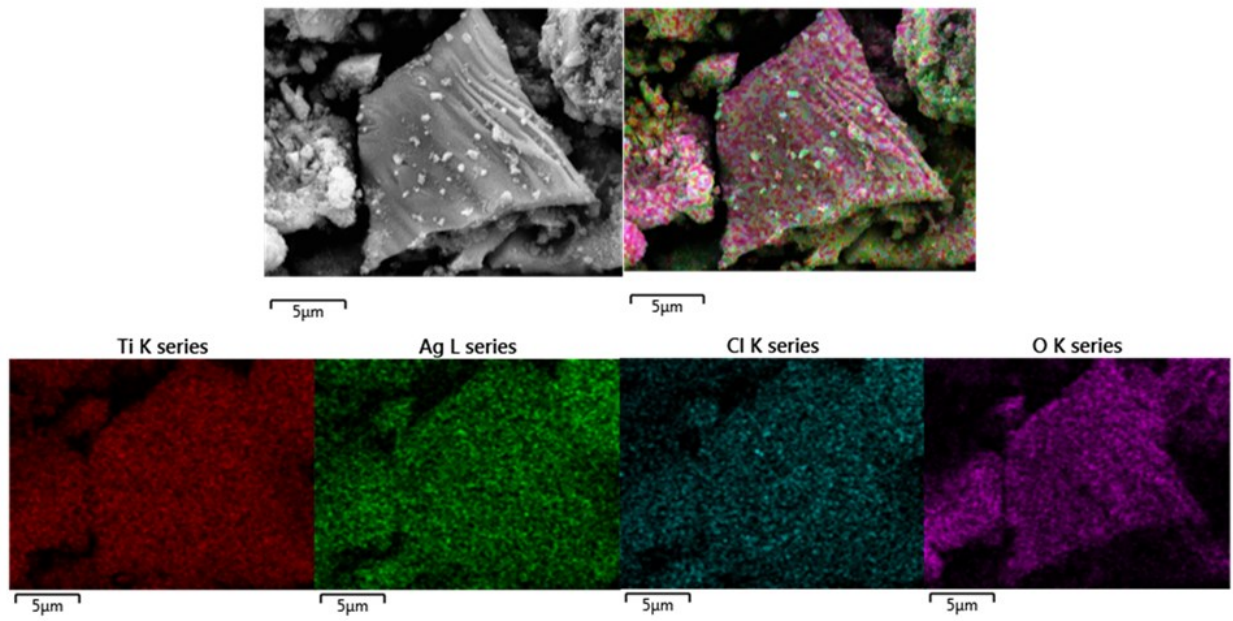

Fig. S3. SEM-EDS mapping images of Ag/AgCl-pTiO<sub>2</sub>

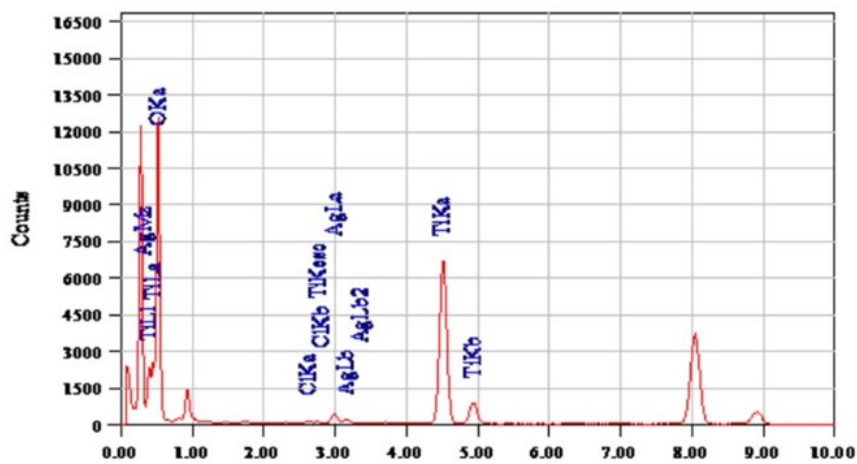

| Element | Atom % |
|---------|--------|
| O       | 73.9   |
| Cl      | 0.4    |
| Ti      | 23.7   |
| Ag      | 2.0    |
| Total   | 100    |

Fig. S4. EDS analysis of Ag/AgCl-pTiO<sub>2</sub>

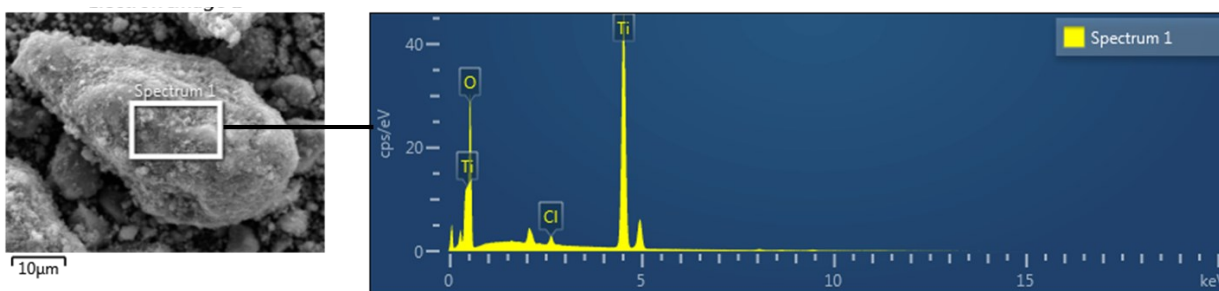

| Element | Atomic % |
|---------|----------|
| O       | 73.84    |
| Cl      | 0.50     |
| Ti      | 25.65    |
| Total:  | 100.00   |

Fig. S5. EDS analysis of Cl-pTiO<sub>2</sub>



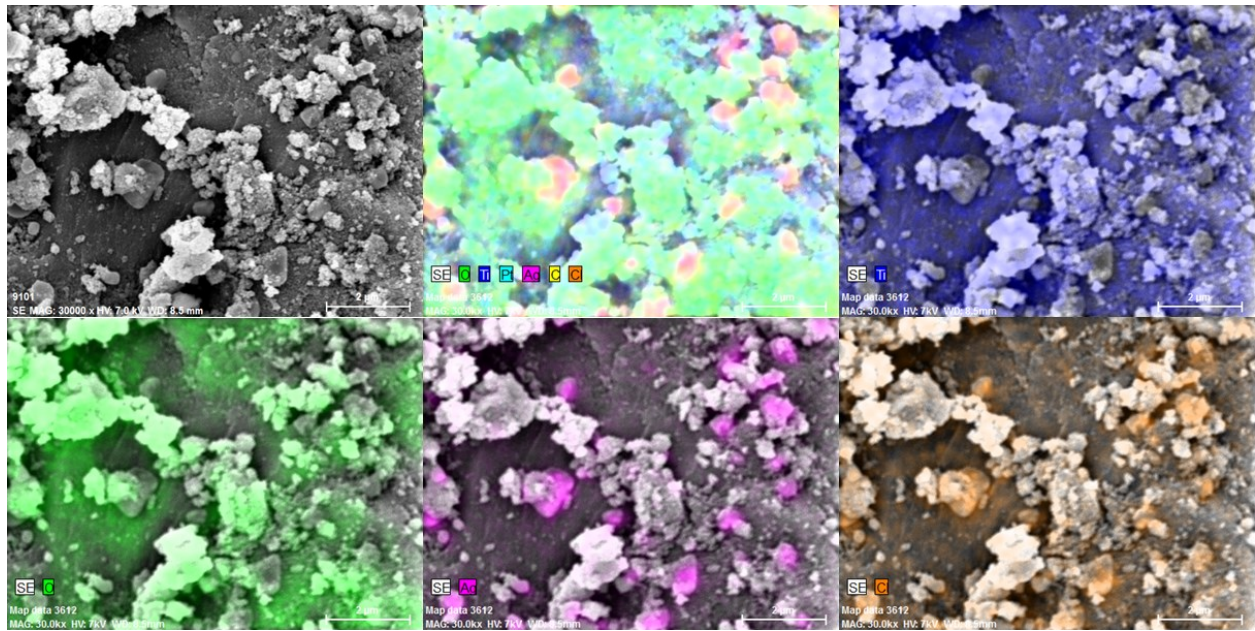

Fig. S6. SEM-EDS mapping images of Ag/AgCl-pTiO<sub>2</sub> without aging

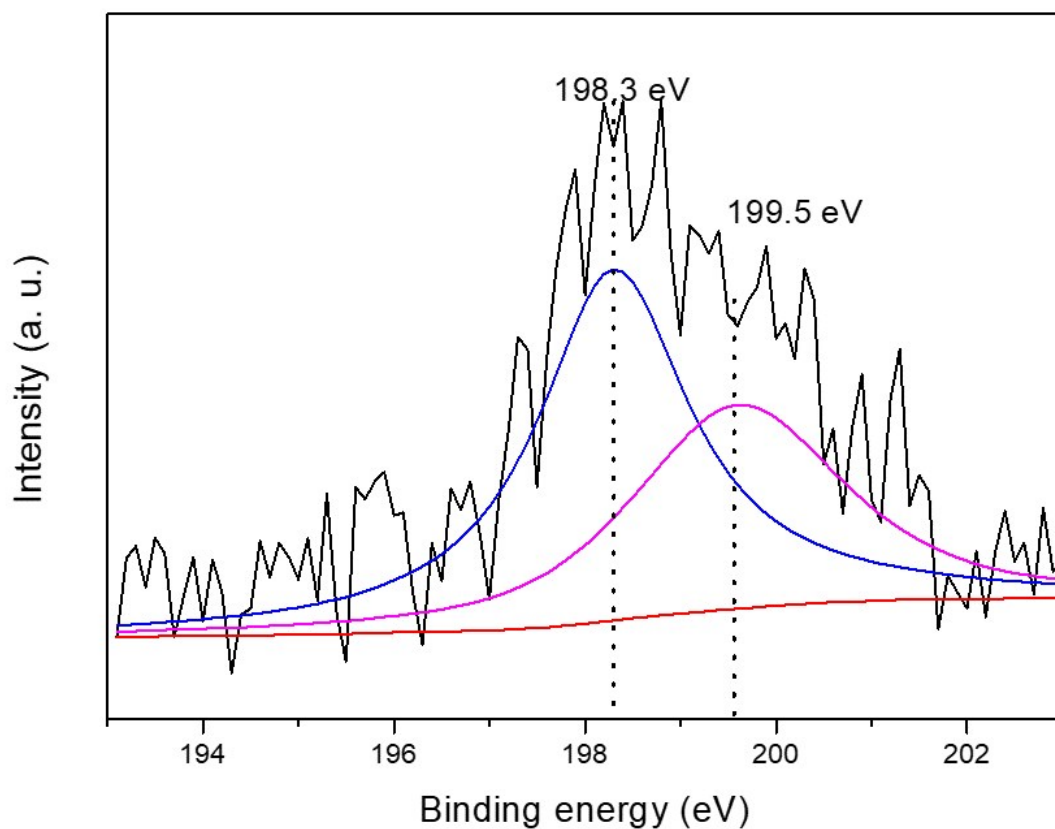

Fig. S7. Cl 2p XPS spectrum of the Cl-doped porous TiO<sub>2</sub>

| Element | Chemical composition of Ag/AgCl-pTiO <sub>2</sub> (Atomic %) |      |      |
|---------|--------------------------------------------------------------|------|------|
|         | Nominal                                                      | EDS  | XPS  |
| Ti      | 28.9                                                         | 23.7 | 26.7 |
| O       | 57.8                                                         | 73.9 | 66.9 |
| Ag      | 5                                                            | 2    | 4.6  |
| Cl      | 1.4                                                          | 0.4  | 1.8  |

Table S1. Nominal and measured chemical composition of Ag/AgCl-pTiO<sub>2</sub>

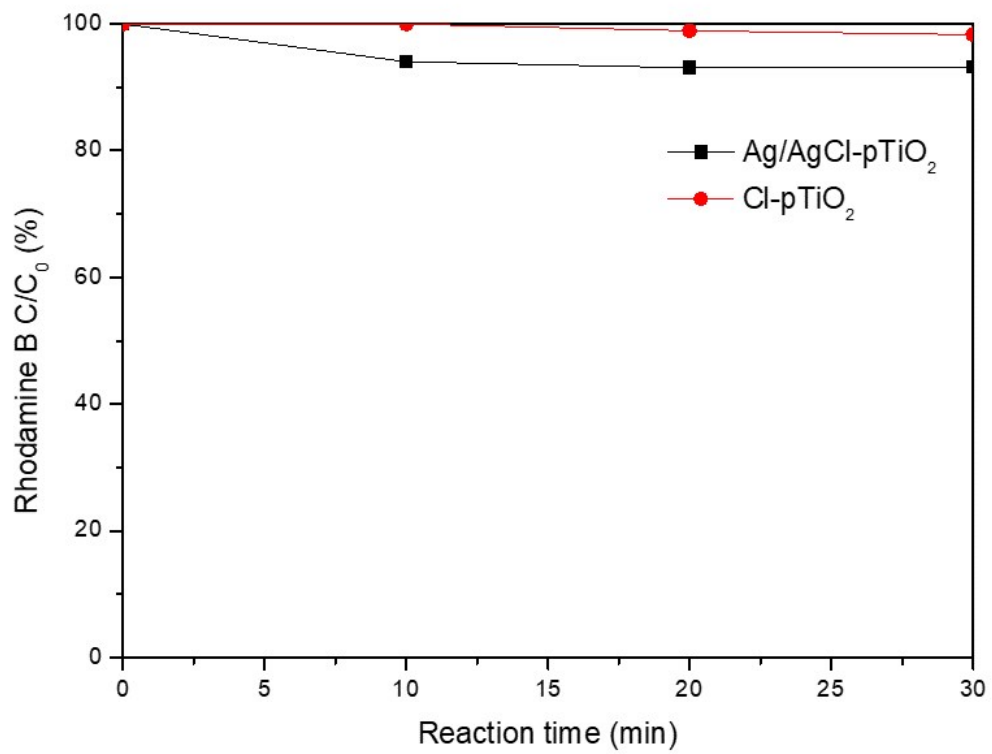

Fig. S8. Adsorption capability of Ag/AgCl-pTiO<sub>2</sub> vs Cl-pTiO<sub>2</sub> for rhodamine B



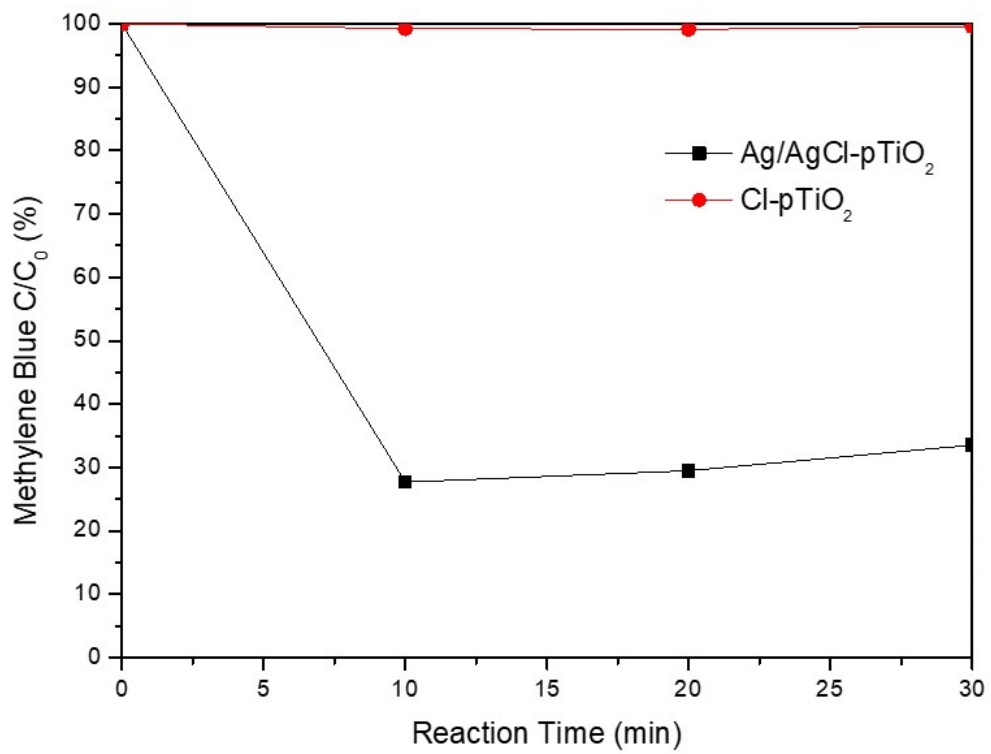

Fig. S9. Adsorption capability of Ag/AgCl-pTiO<sub>2</sub> vs Cl-pTiO<sub>2</sub> for methylene blue

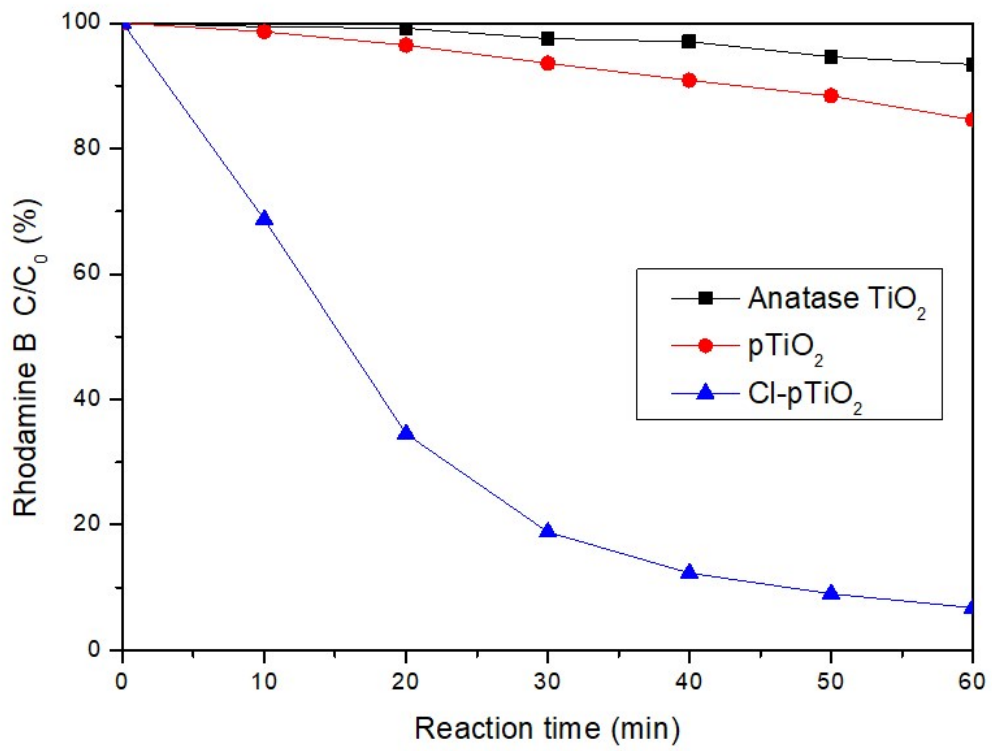

Fig. S10. Photocatalytic activity of commercial anatase TiO<sub>2</sub>, pTiO<sub>2</sub>, Cl-pTiO<sub>2</sub> for rhodamine B degradation

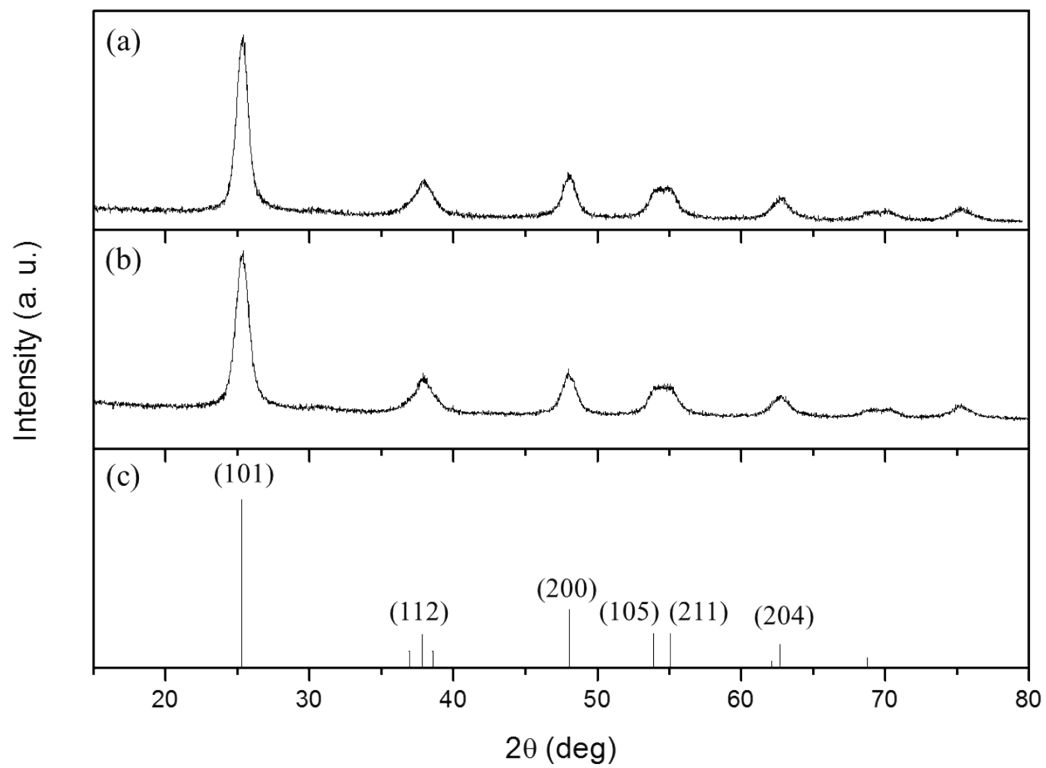

Fig. S11. XRD patterns of (a)  $pTiO_2$  (b)  $Cl-pTiO_2$  and (c) anatase  $TiO_2$  (JCPDS: 00-021-1272)

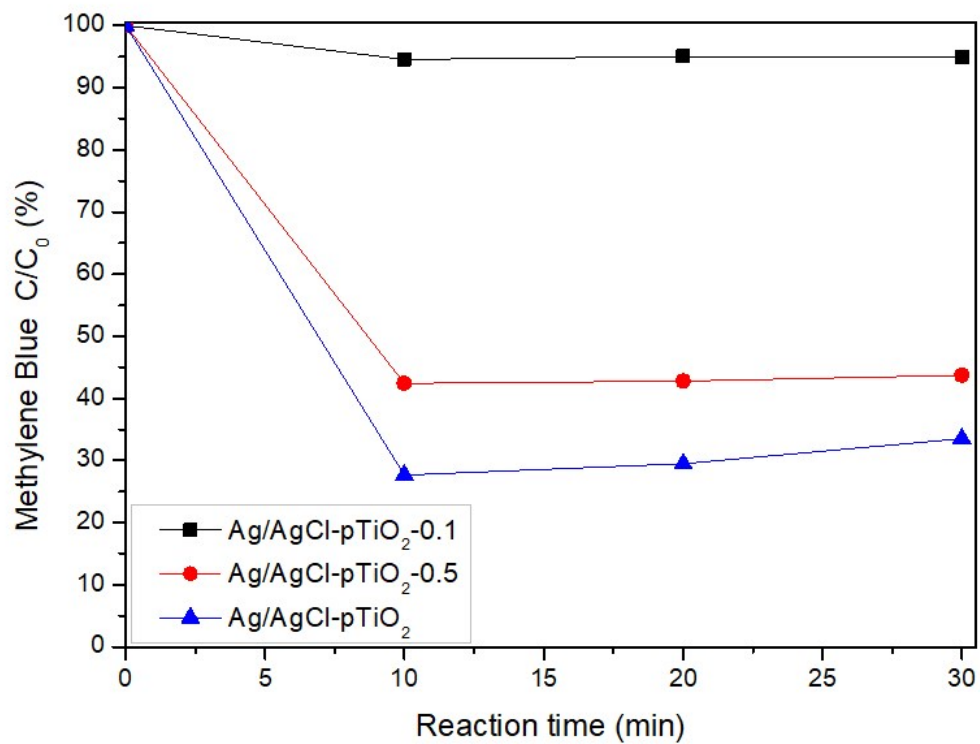

Fig. S12. Adsorption capabilities of Ag/AgCl-pTiO<sub>2</sub>-0.1, Ag/AgCl-pTiO<sub>2</sub>-0.5, Ag/AgCl-pTiO<sub>2</sub> for methylene blue

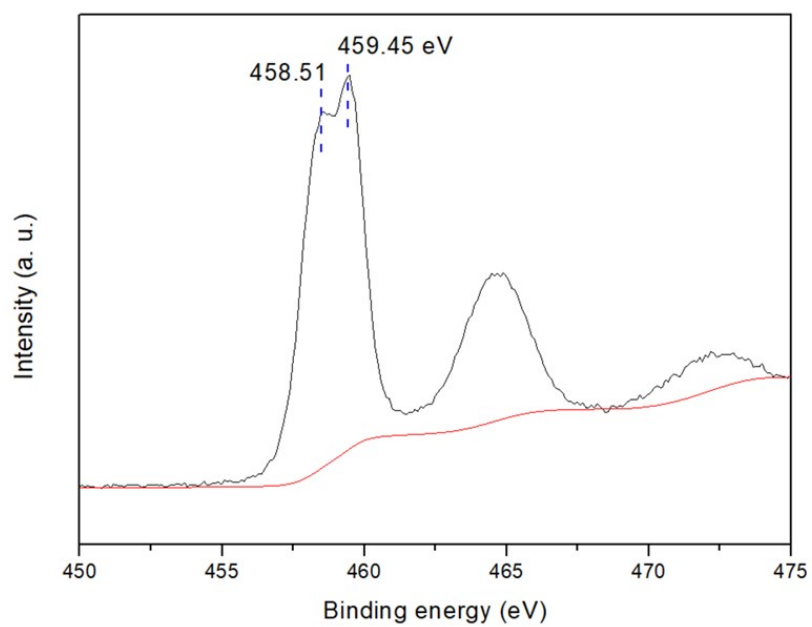

Fig. S13. XPS data Ti of Ag/AgCl-pTiO<sub>2</sub> after MB adsorption

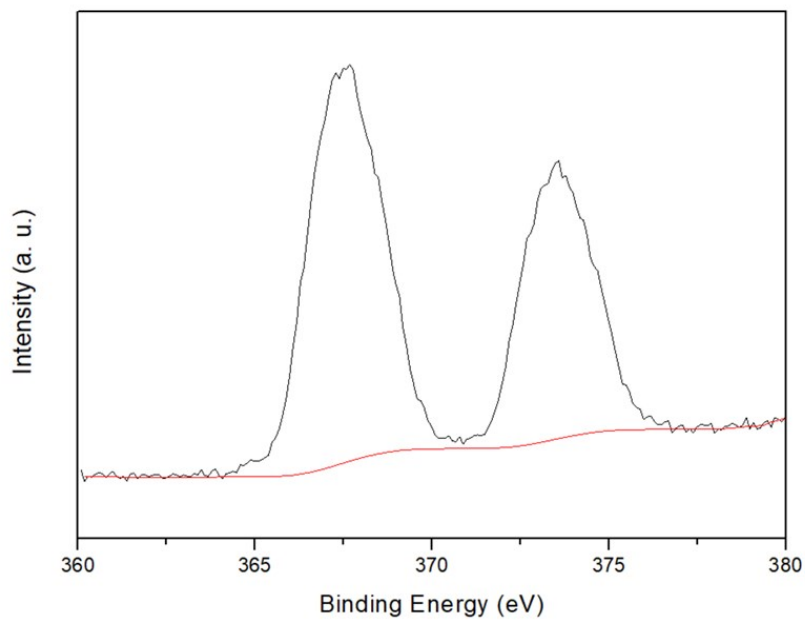

Fig. S14. XPS data Ag of Ag/AgCl-pTiO<sub>2</sub> after MB adsorption

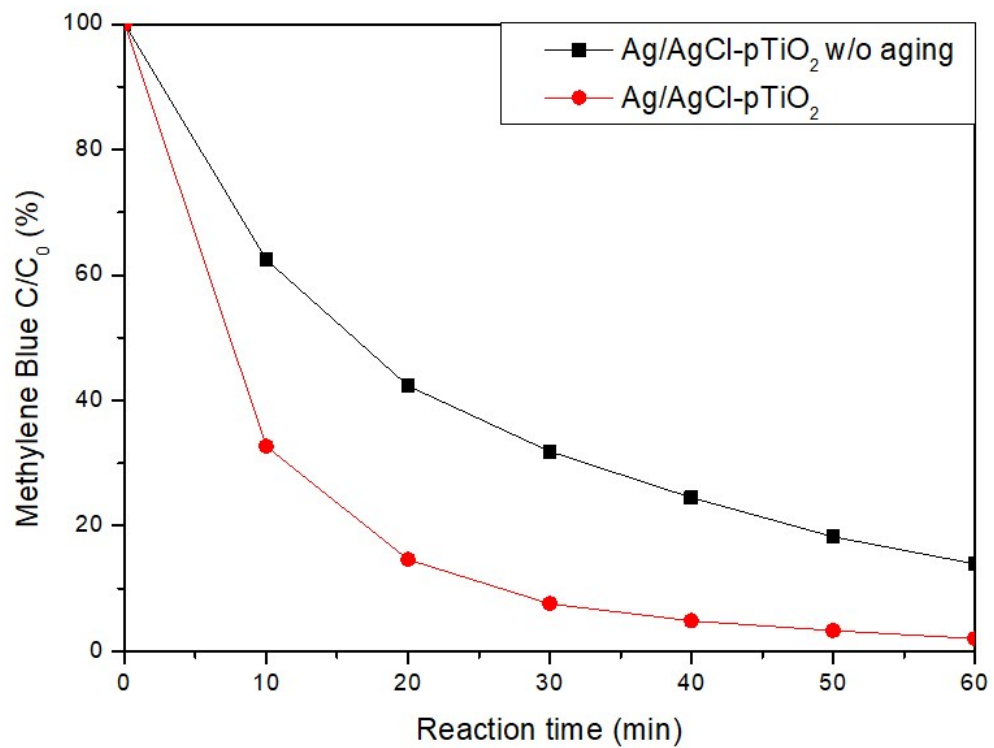

Fig. S15. Photocatalytic degradation efficiency of aged Ag/AgCl-TiO<sub>2</sub> and unaged Ag/AgCl-pTiO<sub>2</sub> for methylene blue



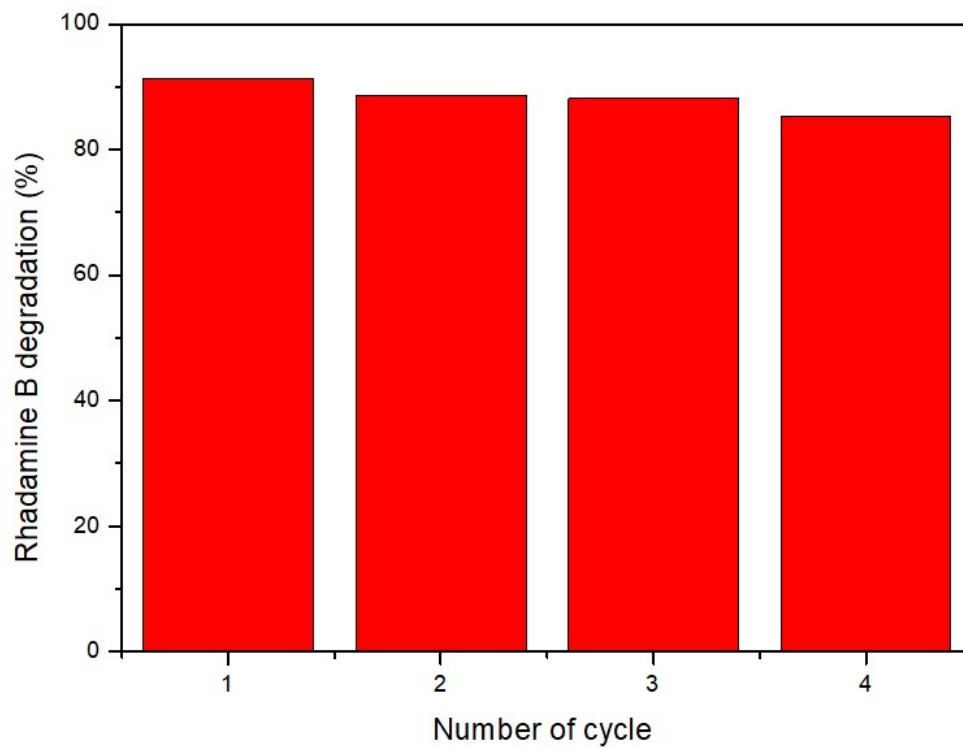

Fig. S16. Cycling photocatalytic performance for rhodamine B degradation of Ag/AgCl-pTiO<sub>2</sub> after light irradiation (405 nm) for 60 minutes.
